# Supplementary material for: Elevated growth temperature decreases levels of the PEX5 peroxisome-targeting signal receptor and ameliorates defects of Arabidopsis mutants with an impaired PEX4 ubiquitin-conjugating enzyme
Source: PubMed Central journal article supplement (PMC4574000; doi:10.1186/s12870-015-0605-3), 2015-09-16

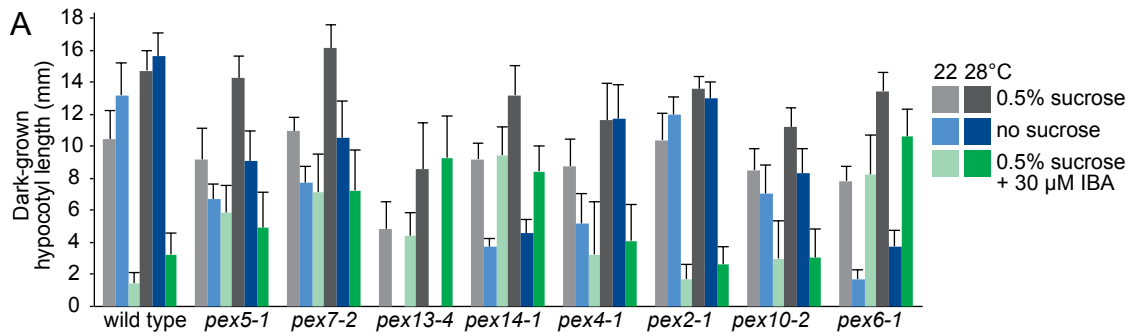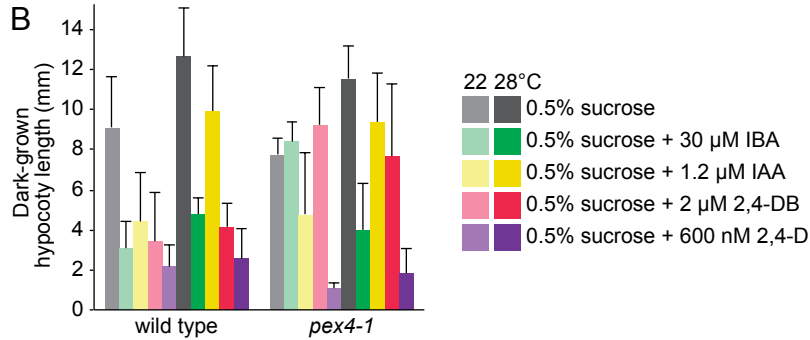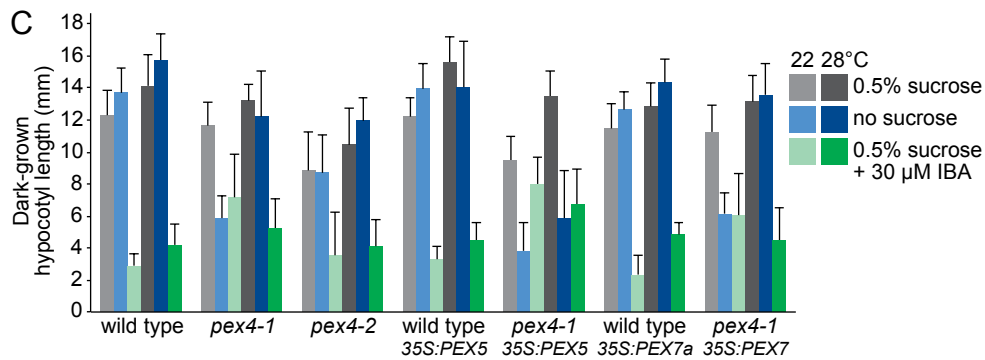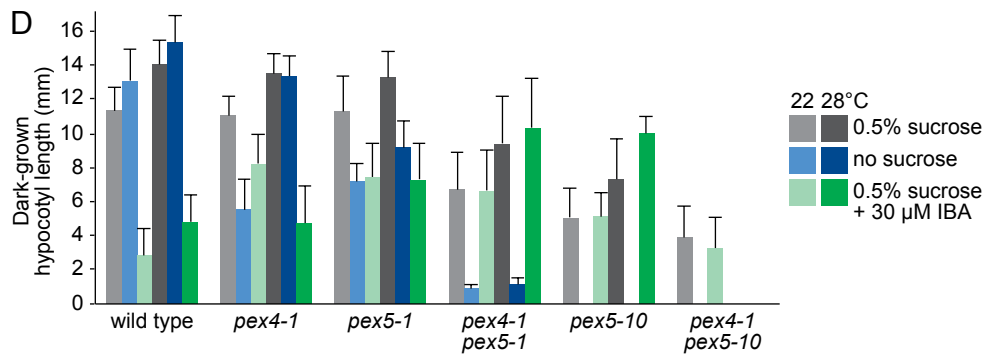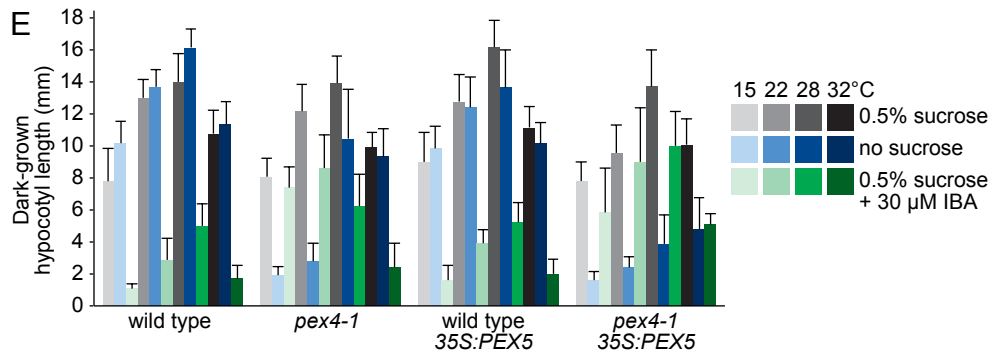

Supplement: 12870_2015_605_MOESM1_ESM.pdf [file 12870_2015_605_MOESM1_ESM.pdf]
