# Supplementary material for: Elevated growth temperature decreases levels of the PEX5 peroxisome-targeting signal receptor and ameliorates defects of Arabidopsis mutants with an impaired PEX4 ubiquitin-conjugating enzyme
Source: PubMed Central journal article supplement (PMC4574000; doi:10.1186/s12870-015-0605-3), 2015-09-16
Supplement: 12870_2015_605_MOESM3_ESM.pdf [file 12870_2015_605_MOESM3_ESM.pdf]

### Additional file 3. PCR-based markers for genotyping mutants.

| Genotype        | Primers                                                                               | Restriction enzyme | Product size (bp) |             |
|-----------------|---------------------------------------------------------------------------------------|--------------------|-------------------|-------------|
|                 |                                                                                       |                    | Wild type         | Mutant      |
| <i>atg7-3</i>   | LB1-SAIL (GCCTTTTCAGAAATGGATAAATAGCCTTGCTTCC)<br>ATG7-5 (GTTGCCATGTCTAATCCAGTCAGG)    | -                  | none              | 350         |
| <i>ATG7</i>     | ATG7-5 (GTTGCCATGTCTAATCCAGTCAGG)<br>ATG7-23 (GTTGCCATGTCTAATCCAGTCAGG)               | -                  | 281               | none        |
| <i>pex4-1</i>   | PEX4-A (TGCATCTCTTTTTATAACAACCTTCTCC)<br>PEX4-B (GAACTAGAACCGAACGGGAACCAAACC)         | <i>MnlI</i>        | 201,<br>91        | 292         |
| <i>pex4-2</i>   | PEX4-16 (ATTCGGGTTGCTTCAGTTCCG)<br>PEX4-dCAPS-Rsal (CTTAGAAGATTCCCTTTTTTCCATAGCAAG)   | <i>RsaI</i>        | 139               | 108,<br>31  |
| <i>pex5-1</i>   | PEX5-B (TCATCAATAATAAGTTCACCACGGCTCATCT)<br>PEX5-32 (GTTGGACGACATATCTCTTTTCTGG)       | <i>EcoRI</i>       | 77,<br>59,117     | 77,<br>176  |
| <i>pex5-10</i>  | LB1-SALK (CAAACCAGCGTGGACCGCTTGCTGCAACTC)<br>PEX5-21 (GATATCAAATGCGACTCAAACACTGATGAC) | -                  | none              | 405         |
| <i>PEX5</i>     | PEX5-3 (GTCGTTGGCTGAATATTTTGTTCGGC)<br>PEX5-21 (GATATCAAATGCGACTCAAACACTGATGAC)       | -                  | 541               | none        |
| <i>35S:PEX5</i> | PEX5-38 (TGAAGACCAACAGATAAGG)<br>PEX5-39 (CCCATTGGAGGCATAGG)                          | -                  | 264               | 264,<br>168 |
| <i>35S:PEX7</i> | 35S-F (GGATGACGCACAATCCCCTATCCTTCG)<br>PEX7-22 (AGGCGTGACTCGTAGAATGGACTG)             | -                  | none              | 158         |

*pex4-1* carries a C-to-T mutation at the 533<sup>rd</sup> nucleotide that destroys an *MnlI* restriction enzyme cut site.

*pex4-2* carries an intronic G-to-A mutation at the 1085<sup>th</sup> nucleotide (18 bp 5' of the fourth exon of *PEX4*). We used the dCAPS website [<http://helix.wustl.edu/dcaps/dcaps.html>, 73] to design a genotyping marker for *pex4-2*.

*pex5-1* carries a C-to-T mutation at the 2910<sup>th</sup> nucleotide that destroys an *EcoRI* restriction enzyme cut site [3].

*pex5-10* has a T-DNA inserted in exon 5 and results the reduced and truncated *pex5-10* protein [13].

The *35S:PEX5* construct expresses a *PEX5* cDNA [17]; for *35S:PEX5* genotyping, *PEX5* primers spanning introns were used to amplify larger genomic *PEX5* or the smaller *PEX5* cDNA products.

*PEX7* lacks introns, so a primer from the *35S* promoter and a reverse *PEX7* primer were used to genotype *35S:PEX7* lines.
